# Supplementary material for: Fabrication of a magnetic ternary ZnFe2O4/TiO2/RGO Z-scheme system with efficient photocatalytic activity and easy recyclability
Source: Royal Society of Chemistry journal article supplement (doi:10.1039/d0ra01880e), 2020-01-01
Supplement: d0ra01880e1.pdf [file d0ra01880e1.pdf]

## Supporting Information

### Fabrication of magnetic ternary $\text{ZnFe}_2\text{O}_4/\text{TiO}_2/\text{RGO}$ Z-Scheme system with efficient photocatalytic activity and easy recyclability

Yuwei Sun <sup>a,b</sup>, Jiashuang Lei <sup>b</sup>, Yizhu Wang <sup>b</sup>, Qian Tang <sup>b</sup>, Chunli Kang\*.

<sup>a</sup> Key Lab of Groundwater Resources and Environment, Ministry of Education, Jilin University, Changchun 130012, Jilin, China.

<sup>b</sup> College of Environmental Science and Engineering, Jilin Normal University, Siping 136000, Jilin, China.

#### Preparation of GO

GO was synthesized by modified Hummer's method [1]. Briefly, 1 g graphite powder, 0.5 g  $\text{NaNO}_3$  and 23 mL  $\text{H}_2\text{SO}_4$  were mixed by stirring for 0.5 h at 0 °C. 3 g  $\text{KMnO}_4$  was slowly added to the mixture with stirring under 15 °C. And then the mixture was stirred for another 0.5 h at 35 °C. Subsequently, 46 mL DI water was added into the mixture and further stirred for 0.5h at 98 °C. Later, 100 mL DI water and 10 mL  $\text{H}_2\text{O}_2$  were added into the mixture followed by stirring. The color of the mixture was changed to yellowish. Then GO was washed with HCl and DI water for several times. The purified solid was dried by freezer dryer (-56 °C for 24 h).

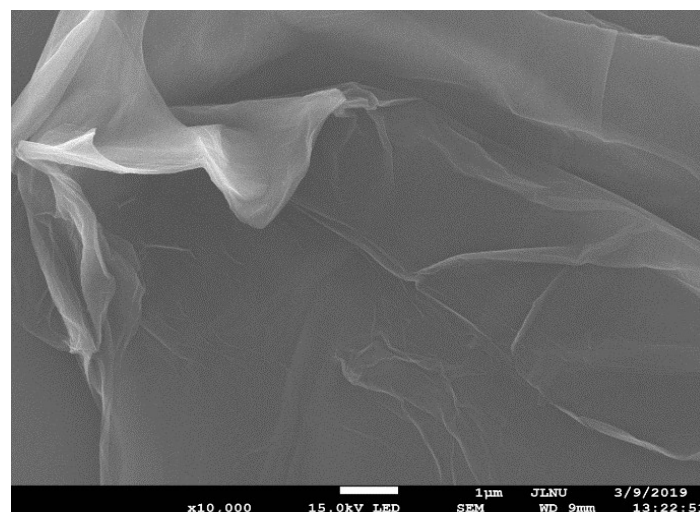

Figure S1 SEM image of GO

### The calculation of $E_g$ , $E_{VB}$ and $E_{CB}$ of the prepared samples

The band gap energies of  $ZnFe_2O_4$  and  $TiO_2$  can be calculated by the following formula:

$$ah\nu = A (h\nu - E_g)^{n/2} \quad (1)$$

The  $\alpha$  is the absorption coefficient,  $\nu$  is the light frequency,  $A$  is a constant and  $E_g$  is the band-gap energy. The  $n$  values of  $TiO_2$  and  $ZnFe_2O_4$  are 4 and 1, respectively [2,3]. As illustrated in Fig. 2b, according to formula (1), the  $E_g$  of  $TiO_2$  and  $ZnFe_2O_4$  can be calculated as 2.95 eV and 1.91 eV, respectively. Therefore, the band positions of  $TiO_2$  and  $ZnFe_2O_4$  were calculated by formulas (2) and (3):

$$E_{VB} = X - E^e + 0.5E_g \quad (2)$$

$$E_{CB} = E_{VB} - E_g \quad (3)$$

The  $E_{VB}$  is the valence band edge potential,  $E_{CB}$  is the conduction band edge potential,  $X$  is the electronegativity of the semiconductor (for  $TiO_2 = 5.81$  eV [4] and for  $ZnFe_2O_4 = 5.05$  eV [5]),  $E^e$  is the energy of free electrons on the hydrogen scale (border on 4.5 eV). According to formula (2) and (3), the calculated  $E_{VB}$  and  $E_{CB}$  of  $TiO_2$  are 2.785 eV and -0.165 eV, respectively. And for  $ZnFe_2O_4$ ,  $E_{VB}$  and  $E_{CB}$  are 1.505 eV and -0.405 eV, respectively.

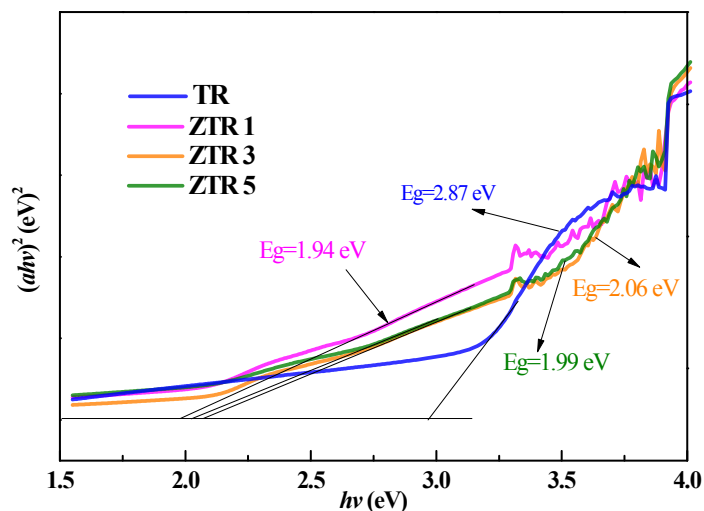

Figure S2 Calculation on the band gap energies of TR, ZTR 1, ZTR 3 and ZTR 5 composites

Furthermore, we calculated the Kubelka-Munk functions of versus the light energy of TR, ZTR 1, ZTR 3 and ZTR 5 composites, the results are shown in Fig. S2 The band

gap energy of TR, ZTR 1, ZTR 3 and ZTR 5 composites 2.87 eV, 2.06 eV, are 1.99 eV and 1.94 eV, respectively.

### The EDS spectrum

Figure S3 shows EDS spectrum of the ZTR 3 composite as catalyst for photocatalytic degradation of *p*-Nitrophenol (*p*-NP). Elements C, O, Ti, Fe and Zn belong to RGO, TiO<sub>2</sub> and ZnFe<sub>2</sub>O<sub>4</sub>, suggesting the successful fabrication of the ternary composite.

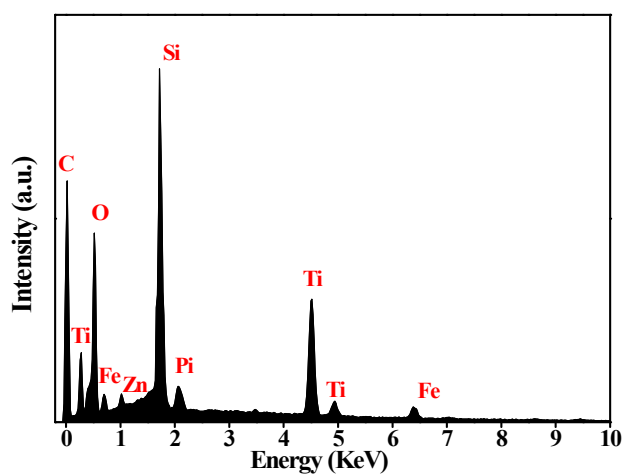

Fig. S3 EDS spectrum of the ZTR 3 composite

### The active species trapping experiments

The active species trapping experiments were carried out during photocatalytic reactions. ammonium oxalate (AO), 2-propanol (IPA) and 1, 4-benzoquinone (BQ) were used as the quencher of  $h^+$ ,  $\bullet OH$  and  $\bullet O_2^-$ , respectively. In a typical experiment, AO (6 mmol/L), IPA (20 mmol/L) and BQ (0.2 mmol/L) were added into the *p*-NP solution before addition of the photocatalyst to scavenge the reactive species, respectively. The subsequent experiments were the same as the previous photocatalytic degradation experiments.

### References

- [1] A. A. Nada, H. R. Tantawy, M. A. Elsayed, M. Bechelany, M. E. Elmowafy, Solid State Sciences, **2018**, 78, 116-125.
- [2] X. Lin, X. Y. Guo, W. L. Shi, F. Guo, G. B. Che, H. J. Zhai, Y. S. Yan, Q. W. Wang, Solid State

Sciences, **2018**, 78, 116-125.

[3] R. Tao, C. C. Zhao, C. L. Shao, X. H. Li, X. W. Li, J. Zhang, S. Yang, Y. C. Liu, *Materials Research Bulletin*, **2018**, 104, 124-133.

[4] H. Khan, M. G. Rigamonti, G. S. Patience, D. C. Boffit, *Applied Catalysis B: Environmental*, **2018**, 226, 311-323.

[5] X. J. Chen, Y. Z. Dai, T. H. Liu, *Catalysis Communications*, **2015**, 71, 21-27.
